# Supplementary material for: Hemoglobins in the genome of the cryptomonad Guillardia theta
Source: PubMed Central journal article supplement (PMC4101818; doi:10.1186/1745-6150-9-7), 2014-05-08

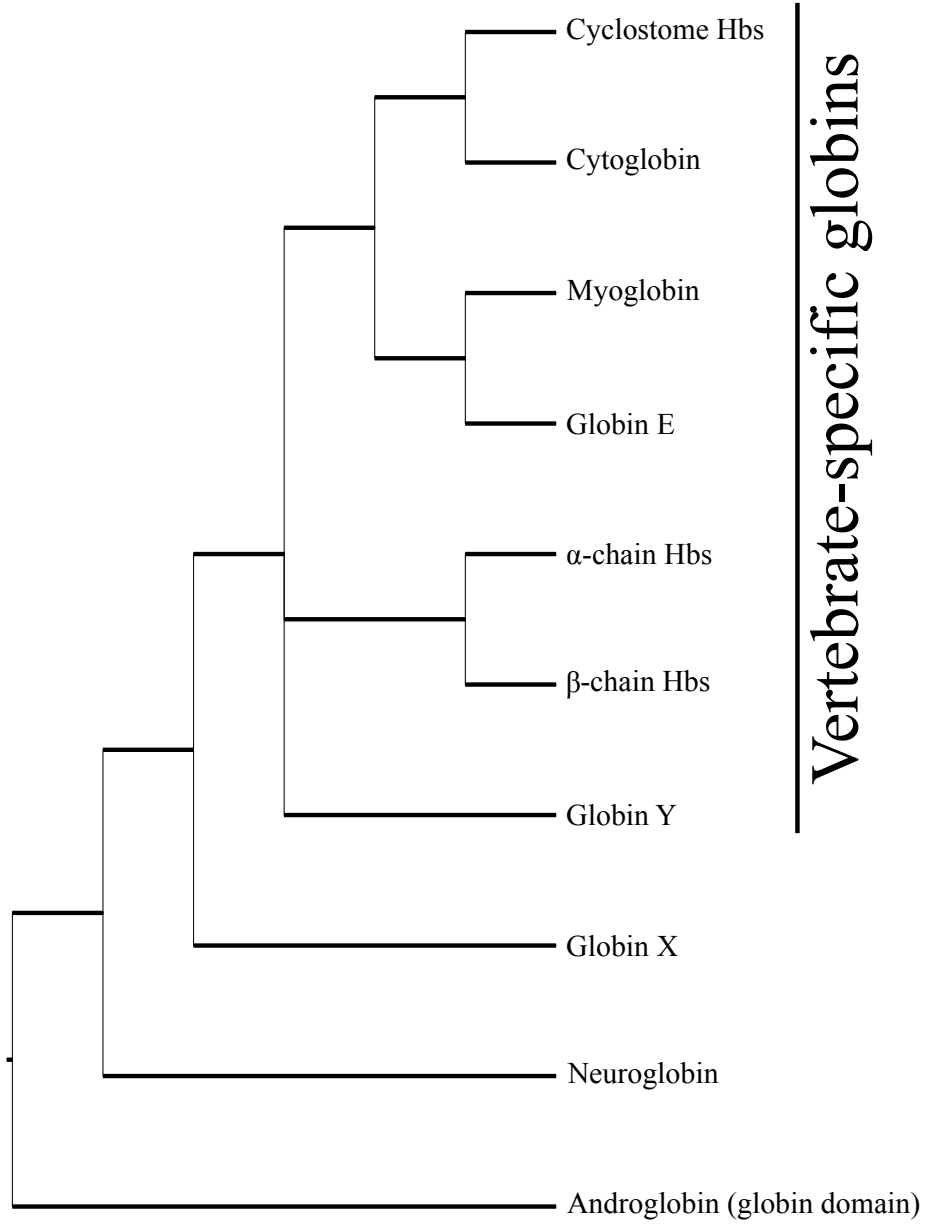

Supplement: 1745-6150-9-7-S7.pdf [file 1745-6150-9-7-S7.pdf]
